# Supplementary material for: Оценка скоростей вертикальных смещений земной поверхности и изменений плотности земной коры на юго-западе Байкальской рифтовой зоны и в горном Алтае по данным гравиметрического мониторинга
Source: Springer Nature journal article supplement (doi:10.1007/s10049-021-00948-z), 2011-01-01
Supplement: MOESM1 [file 19752086]

**Zusatzmaterial zum Beitrag** „SARS-CoV-2-IgG-Antikörperseroprävalenz bei Personal in der außerklinischen Bekämpfung der COVID-19-Pandemie“ von Brune B, Koth J, Fessmann K et al. (2021) in *Notfall+Rettenungsmedizin* .

*Beitrag und Zusatzmaterial stehen Ihnen auf [www.springermedizin.de](http://www.springermedizin.de) zur Verfügung. Bitte geben Sie dort den Beitragstitel in die Suche ein.*

| Studiennummer | Alter | Geschlecht | Rettungsdienst | Abstrich-Team | Brandschutz | Lagezentrum | CLIA-Ergebnis neg/pos |
|---------------|-------|------------|----------------|---------------|-------------|-------------|-----------------------|
| 17100019      | 51    | m          | ja             | ja            | ja          | nein        | positiv               |
| 17100066      | 53    | m          | ja             | nein          | ja          | ja          | positiv               |
| 17100102      | 35    | w          | nein           | nein          | nein        | ja          | positiv               |
| 17100387      | 46    | m          | ja             | nein          | ja          | nein        | positiv               |
| 17100395      | 38    | m          | ja             | nein          | nein        | nein        | positiv               |
| 17100420      | 31    | m          | nein           | nein          | nein        | ja          | positiv               |
| 17100458      | 22    | w          | nein           | nein          | nein        | ja          | positiv               |
| 17100634      | 52    | m          | nein           | nein          | ja          | nein        | positiv               |
| 17100001      | 42    | w          | nein           | nein          | nein        | ja          | negativ               |
| 17100002      | 43    | m          | ja             | ja            | ja          | nein        | negativ               |
| 17100003      | 47    | m          | ja             | nein          | ja          | nein        | negativ               |
| 17100004      | 26    | w          | ja             | ja            | ja          | nein        | negativ               |
| 17100005      | 33    | m          | ja             | nein          | ja          | nein        | negativ               |
| 17100006      | 52    | m          | nein           | nein          | nein        | ja          | negativ               |
| 17100007      | 48    | m          | nein           | nein          | ja          | ja          | negativ               |
| 17100008      | 57    | m          | ja             | nein          | ja          | nein        | negativ               |
| 17100010      | 37    | m          | ja             | nein          | ja          | nein        | negativ               |
| 17100011      | 52    | m          | nein           | nein          | nein        | ja          | negativ               |
| 17100012      | 32    | m          | nein           | nein          | ja          | nein        | negativ               |
| 17100013      | 60    | m          | nein           | nein          | nein        | ja          | negativ               |
| 17100014      | 30    | m          | nein           | nein          | ja          | nein        | negativ               |
| 17100015      | 55    | w          | nein           | nein          | nein        | ja          | negativ               |
| 17100016      | 52    | m          | nein           | nein          | ja          | nein        | negativ               |
| 17100017      | 32    | m          | ja             | nein          | ja          | nein        | negativ               |
| 17100018      | 43    | m          | nein           | nein          | nein        | ja          | negativ               |
| 17100020      | 55    | m          | nein           | nein          | nein        | ja          | negativ               |
| 17100021      | 29    | m          | ja             | nein          | ja          | nein        | negativ               |
| 17100022      | 50    | m          | nein           | nein          | ja          | nein        | negativ               |
| 17100023      | 42    | w          | nein           | nein          | ja          | ja          | negativ               |
| 17100024      | 54    | m          | nein           | nein          | ja          | nein        | negativ               |
| 17100025      | 51    | m          | ja             | nein          | ja          | nein        | negativ               |
| 17100026      | 40    | m          | ja             | nein          | ja          | nein        | negativ               |
| 17100027      | 35    | m          | ja             | nein          | ja          | nein        | negativ               |
| 17100028      | 55    | m          | nein           | nein          | ja          | nein        | negativ               |
| 17100029      | 43    | m          | nein           | nein          | ja          | ja          | negativ               |
| 17100030      | 34    | m          | nein           | nein          | ja          | nein        | negativ               |
| 17100031      | 50    | w          | nein           | nein          | nein        | ja          | negativ               |
| 17100032      | 46    | m          | ja             | ja            | ja          | nein        | negativ               |
| 17100033      | 53    | m          | nein           | nein          | nein        | ja          | negativ               |

|          |    |   |      |      |      |      |         |
|----------|----|---|------|------|------|------|---------|
| 17100034 | 47 | w | nein | nein | nein | ja   | negativ |
| 17100035 | 40 | m | ja   | nein | ja   | nein | negativ |
| 17100036 | 56 | m | nein | nein | ja   | nein | negativ |
| 17100037 | 40 | m | ja   | ja   | ja   | ja   | negativ |
| 17100038 | 59 | m | ja   | nein | nein | nein | negativ |
| 17100039 | 52 | m | ja   | nein | ja   | nein | negativ |
| 17100040 | 26 | m | ja   | nein | ja   | nein | negativ |
| 17100041 | 55 | m | nein | nein | ja   | nein | negativ |
| 17100042 | 43 | m | nein | nein | nein | ja   | negativ |
| 17100043 | 43 | m | ja   | nein | ja   | nein | negativ |
| 17100044 | 44 | m | ja   | ja   | ja   | nein | negativ |
| 17100045 | 24 | m | ja   | ja   | ja   | nein | negativ |
| 17100046 | 30 | w | nein | nein | nein | ja   | negativ |
| 17100047 | 54 | m | nein | nein | nein | ja   | negativ |
| 17100048 | 33 | w | nein | nein | nein | ja   | negativ |
| 17100049 | 56 | w | nein | nein | nein | ja   | negativ |
| 17100050 | 44 | m | nein | nein | ja   | nein | negativ |
| 17100051 | 59 | w | nein | nein | nein | ja   | negativ |
| 17100052 | 31 | m | ja   | nein | ja   | nein | negativ |
| 17100053 | 46 | m | nein | nein | nein | ja   | negativ |
| 17100054 | 33 | m | ja   | ja   | ja   | nein | negativ |
| 17100055 | 54 | m | nein | nein | nein | ja   | negativ |
| 17100056 | 49 | m | ja   | nein | nein | ja   | negativ |
| 17100057 | 50 | m | nein | nein | nein | ja   | negativ |
| 17100058 | 28 | w | nein | nein | nein | nein | negativ |
| 17100059 | 59 | m | nein | nein | nein | ja   | negativ |
| 17100060 | 52 | m | nein | nein | nein | ja   | negativ |
| 17100061 | 28 | m | ja   | nein | ja   | nein | negativ |
| 17100062 | 41 | m | nein | nein | ja   | nein | negativ |
| 17100063 | 28 | m | ja   | nein | ja   | nein | negativ |
| 17100064 | 23 | m | ja   | ja   | ja   | nein | negativ |
| 17100065 | 24 | m | ja   | ja   | ja   | nein | negativ |
| 17100067 | 47 | m | ja   | nein | ja   | nein | negativ |
| 17100068 | 41 | m | nein | nein | nein | ja   | negativ |
| 17100069 | 36 | m | ja   | ja   | ja   | nein | negativ |
| 17100070 | 45 | m | ja   | nein | ja   | ja   | negativ |
| 17100071 | 42 | m | ja   | nein | nein | ja   | negativ |
| 17100072 | 28 | m | ja   | ja   | ja   | nein | negativ |
| 17100073 | 28 | m | ja   | ja   | ja   | nein | negativ |
| 17100074 | 67 | m | nein | nein | nein | ja   | negativ |
| 17100075 | 50 | m | nein | nein | ja   | ja   | negativ |
| 17100076 | 41 | m | ja   | nein | ja   | nein | negativ |
| 17100077 | 53 | m | ja   | nein | ja   | nein | negativ |
| 17100078 | 39 | m | ja   | ja   | ja   | nein | negativ |
| 17100079 | 43 | m | ja   | nein | ja   | nein | negativ |
| 17100080 | 38 | m | nein | nein | nein | ja   | negativ |
| 17100081 | 32 | m | nein | nein | ja   | ja   | negativ |
| 17100082 | 47 | m | nein | nein | nein | ja   | negativ |
| 17100083 | 50 | m | ja   | nein | ja   | nein | negativ |
| 17100084 | 45 | m | ja   | ja   | ja   | nein | negativ |

|          |    |   |      |      |      |      |         |
|----------|----|---|------|------|------|------|---------|
| 17100085 | 44 | m | nein | nein | nein | ja   | negativ |
| 17100086 | 55 | m | nein | nein | nein | ja   | negativ |
| 17100088 | 39 | m | nein | nein | nein | ja   | negativ |
| 17100089 | 51 | m | nein | ja   | nein | ja   | negativ |
| 17100090 | 41 | m | ja   | nein | ja   | nein | negativ |
| 17100091 | 58 | m | nein | nein | ja   | ja   | negativ |
| 17100092 | 30 | m | nein | nein | nein | ja   | negativ |
| 17100093 | 56 | m | nein | nein | nein | ja   | negativ |
| 17100094 | 45 | m | ja   | nein | ja   | nein | negativ |
| 17100095 | 47 | m | nein | nein | nein | ja   | negativ |
| 17100096 | 45 | m | nein | nein | nein | ja   | negativ |
| 17100097 | 54 | w | nein | nein | nein | ja   | negativ |
| 17100098 | 39 | m | ja   | nein | ja   | nein | negativ |
| 17100099 | 33 | m | ja   | nein | ja   | ja   | negativ |
| 17100100 | 28 | m | nein | nein | nein | ja   | negativ |
| 17100101 | 40 | m | nein | ja   | ja   | nein | negativ |
| 17100103 | 29 | m | ja   | nein | ja   | nein | negativ |
| 17100104 | 21 | m | ja   | ja   | ja   | nein | negativ |
| 17100105 | 53 | m | ja   | nein | ja   | nein | negativ |
| 17100106 | 42 | m | nein | nein | ja   | ja   | negativ |
| 17100107 | 51 | m | nein | nein | nein | ja   | negativ |
| 17100108 | 42 | m | nein | nein | nein | ja   | negativ |
| 17100109 | 49 | m | nein | ja   | nein | nein | negativ |
| 17100110 | 51 | m | nein | nein | nein | ja   | negativ |
| 17100111 | 43 | m | ja   | nein | ja   | nein | negativ |
| 17100112 | 46 | m | nein | nein | nein | ja   | negativ |
| 17100113 | 32 | m | nein | ja   | nein | ja   | negativ |
| 17100114 | 27 | m | ja   | ja   | ja   | nein | negativ |
| 17100115 | 34 | m | ja   | nein | ja   | nein | negativ |
| 17100116 | 52 | m | nein | nein | nein | ja   | negativ |
| 17100117 | 34 | m | ja   | nein | ja   | ja   | negativ |
| 17100118 | 30 | m | ja   | ja   | ja   | nein | negativ |
| 17100119 | 24 | m | ja   | ja   | ja   | nein | negativ |
| 17100120 | 52 | m | ja   | nein | ja   | nein | negativ |
| 17100121 | 41 | m | ja   | ja   | ja   | nein | negativ |
| 17100122 | 37 | m | nein | nein | ja   | ja   | negativ |
| 17100123 | 30 | m | ja   | ja   | ja   | nein | negativ |
| 17100124 | 57 | m | nein | nein | ja   | nein | negativ |
| 17100125 | 24 | m | ja   | ja   | ja   | ja   | negativ |
| 17100126 | 59 | w | nein | nein | nein | ja   | negativ |
| 17100127 | 52 | m | ja   | nein | ja   | ja   | negativ |
| 17100128 | 53 | m | nein | nein | ja   | ja   | negativ |
| 17100129 | 55 | m | nein | nein | nein | ja   | negativ |
| 17100130 | 28 | m | ja   | ja   | ja   | nein | negativ |
| 17100131 | 52 | m | ja   | ja   | ja   | nein | negativ |
| 17100132 | 48 | m | ja   | nein | ja   | nein | negativ |
| 17100133 | 41 | m | nein | nein | ja   | ja   | negativ |
| 17100134 | 50 | m | ja   | nein | nein | nein | negativ |
| 17100135 | 41 | m | ja   | nein | ja   | nein | negativ |
| 17100136 | 59 | m | nein | nein | nein | ja   | negativ |

|          |    |   |      |      |      |      |         |
|----------|----|---|------|------|------|------|---------|
| 17100137 | 60 | m | nein | nein | nein | ja   | negativ |
| 17100138 | 39 | m | nein | nein | ja   | nein | negativ |
| 17100139 | 47 | w | nein | nein | nein | ja   | negativ |
| 17100140 | 56 | m | ja   | nein | ja   | nein | negativ |
| 17100143 | 43 | m | nein | nein | ja   | ja   | negativ |
| 17100144 | 58 | m | nein | nein | ja   | nein | negativ |
| 17100145 | 45 | m | nein | nein | ja   | ja   | negativ |
| 17100146 | 24 | m | ja   | nein | ja   | nein | negativ |
| 17100147 | 39 | m | nein | nein | ja   | nein | negativ |
| 17100148 | 42 | m | nein | nein | nein | ja   | negativ |
| 17100149 | 34 | m | ja   | ja   | ja   | nein | negativ |
| 17100150 | 43 | m | nein | nein | ja   | nein | negativ |
| 17100151 | 28 | m | ja   | ja   | ja   | nein | negativ |
| 17100152 | 36 | m | ja   | nein | ja   | nein | negativ |
| 17100153 | 33 | m | nein | nein | ja   | nein | negativ |
| 17100154 | 32 | m | ja   | ja   | ja   | nein | negativ |
| 17100155 | 57 | m | nein | nein | nein | ja   | negativ |
| 17100156 | 56 | m | nein | nein | ja   | nein | negativ |
| 17100157 | 41 | m | nein | nein | nein | ja   | negativ |
| 17100158 | 60 | w | nein | nein | nein | ja   | negativ |
| 17100160 | 49 | m | ja   | nein | ja   | nein | negativ |
| 17100161 | 35 | m | ja   | nein | ja   | nein | negativ |
| 17100162 | 30 | m | ja   | nein | ja   | nein | negativ |
| 17100163 | 42 | m | ja   | nein | ja   | nein | negativ |
| 17100164 | 48 | w | nein | nein | nein | ja   | negativ |
| 17100165 | 54 | m | nein | nein | ja   | nein | negativ |
| 17100166 | 49 | m | nein | nein | nein | ja   | negativ |
| 17100167 | 49 | m | nein | nein | ja   | ja   | negativ |
| 17100168 | 49 | m | ja   | ja   | ja   | nein | negativ |
| 17100169 | 33 | m | ja   | nein | ja   | ja   | negativ |
| 17100170 | 55 | m | nein | nein | nein | ja   | negativ |
| 17100171 | 35 | m | ja   | nein | ja   | nein | negativ |
| 17100172 | 35 | w | ja   | ja   | ja   | nein | negativ |
| 17100173 | 34 | m | nein | nein | nein | ja   | negativ |
| 17100174 | 29 | m | ja   | ja   | ja   | nein | negativ |
| 17100175 | 51 | m | nein | nein | nein | ja   | negativ |
| 17100176 | 29 | m | ja   | nein | ja   | nein | negativ |
| 17100177 | 57 | m | nein | nein | nein | ja   | negativ |
| 17100178 | 47 | m | ja   | ja   | ja   | nein | negativ |
| 17100179 | 23 | m | ja   | ja   | ja   | nein | negativ |
| 17100180 | 46 | w | nein | nein | ja   | ja   | negativ |
| 17100181 | 59 | w | nein | nein | nein | ja   | negativ |
| 17100182 | 47 | m | ja   | nein | ja   | nein | negativ |
| 17100183 | 45 | m | nein | nein | ja   | ja   | negativ |
| 17100184 | 57 | m | nein | nein | ja   | ja   | negativ |
| 17100185 | 52 | m | ja   | nein | ja   | ja   | negativ |
| 17100186 | 51 | m | nein | nein | nein | ja   | negativ |
| 17100187 | 35 | m | ja   | nein | ja   | ja   | negativ |
| 17100188 | 52 | m | ja   | nein | ja   | ja   | negativ |
| 17100189 | 38 | m | ja   | nein | ja   | nein | negativ |

|          |    |   |      |      |      |      |         |
|----------|----|---|------|------|------|------|---------|
| 17100190 | 51 | m | ja   | nein | ja   | nein | negativ |
| 17100191 | 37 | m | nein | nein | nein | ja   | negativ |
| 17100192 | 40 | m | ja   | nein | ja   | nein | negativ |
| 17100193 | 54 | m | nein | nein | ja   | ja   | negativ |
| 17100194 | 26 | m | ja   | nein | ja   | nein | negativ |
| 17100195 | 39 | m | ja   | nein | ja   | nein | negativ |
| 17100196 | 60 | m | nein | nein | nein | ja   | negativ |
| 17100197 | 29 | m | nein | nein | ja   | ja   | negativ |
| 17100198 | 51 | m | nein | nein | ja   | nein | negativ |
| 17100199 | 34 | w | nein | nein | nein | ja   | negativ |
| 17100200 | 31 | m | ja   | nein | ja   | ja   | negativ |
| 17100201 | 43 | m | nein | nein | ja   | nein | negativ |
| 17100202 | 38 | m | ja   | ja   | ja   | nein | negativ |
| 17100203 | 32 | m | nein | nein | ja   | nein | negativ |
| 17100204 | 49 | m | ja   | nein | ja   | nein | negativ |
| 17100205 | 40 | m | ja   | nein | ja   | nein | negativ |
| 17100206 | 54 | m | nein | ja   | ja   | ja   | negativ |
| 17100207 | 31 | m | ja   | nein | ja   | nein | negativ |
| 17100208 | 29 | m | nein | ja   | nein | nein | negativ |
| 17100209 | 42 | m | nein | nein | ja   | ja   | negativ |
| 17100210 | 24 | m | ja   | nein | ja   | nein | negativ |
| 17100211 | 46 | m | ja   | ja   | ja   | nein | negativ |
| 17100212 | 34 | m | ja   | nein | ja   | nein | negativ |
| 17100213 | 31 | m | ja   | nein | ja   | nein | negativ |
| 17100214 | 27 | m | nein | nein | ja   | nein | negativ |
| 17100215 | 42 | m | ja   | nein | ja   | nein | negativ |
| 17100216 | 27 | w | ja   | ja   | ja   | nein | negativ |
| 17100217 | 27 | m | nein | nein | ja   | nein | negativ |
| 17100218 | 45 | m | nein | nein | nein | ja   | negativ |
| 17100219 | 26 | m | nein | nein | ja   | nein | negativ |
| 17100220 | 21 | m | ja   | nein | nein | nein | negativ |
| 17100221 | 24 | m | ja   | ja   | ja   | ja   | negativ |
| 17100223 | 25 | m | ja   | nein | nein | nein | negativ |
| 17100224 | 30 | m | ja   | ja   | ja   | nein | negativ |
| 17100225 | 59 | m | nein | nein | ja   | nein | negativ |
| 17100226 | 54 | m | nein | nein | nein | nein | negativ |
| 17100227 | 54 | m | nein | nein | ja   | nein | negativ |
| 17100228 | 26 | m | nein | nein | ja   | nein | negativ |
| 17100229 | 46 | m | nein | nein | nein | ja   | negativ |
| 17100230 | 35 | m | ja   | ja   | ja   | nein | negativ |
| 17100231 | 36 | m | ja   | nein | ja   | ja   | negativ |
| 17100232 | 40 | m | ja   | ja   | ja   | nein | negativ |
| 17100233 | 34 | w | nein | nein | nein | ja   | negativ |
| 17100234 | 33 | m | nein | nein | ja   | nein | negativ |
| 17100235 | 24 | m | nein | nein | ja   | nein | negativ |
| 17100236 | 26 | m | nein | nein | ja   | nein | negativ |
| 17100237 | 52 | m | nein | nein | nein | ja   | negativ |
| 17100238 | 51 | m | nein | nein | ja   | nein | negativ |
| 17100239 | 50 | w | nein | nein | nein | ja   | negativ |
| 17100240 | 40 | m | nein | nein | nein | ja   | negativ |

|          |    |   |      |      |      |      |         |
|----------|----|---|------|------|------|------|---------|
| 17100241 | 62 | w | nein | nein | nein | ja   | negativ |
| 17100242 | 29 | m | nein | nein | ja   | nein | negativ |
| 17100243 | 35 | m | ja   | ja   | ja   | nein | negativ |
| 17100244 | 49 | m | ja   | nein | ja   | nein | negativ |
| 17100245 | 26 | m | ja   | ja   | ja   | nein | negativ |
| 17100246 | 31 | m | ja   | ja   | ja   | nein | negativ |
| 17100247 | 23 | m | ja   | ja   | ja   | nein | negativ |
| 17100248 | 30 | m | nein | ja   | ja   | nein | negativ |
| 17100249 | 28 | m | ja   | ja   | ja   | nein | negativ |
| 17100250 | 42 | m | ja   | ja   | ja   | nein | negativ |
| 17100251 | 26 | m | ja   | ja   | ja   | nein | negativ |
| 17100252 | 40 | m | ja   | ja   | ja   | nein | negativ |
| 17100253 | 24 | m | ja   | ja   | ja   | nein | negativ |
| 17100254 | 53 | m | nein | ja   | nein | nein | negativ |
| 17100256 | 30 | m | ja   | ja   | ja   | nein | negativ |
| 17100257 | 34 | m | ja   | ja   | ja   | nein | negativ |
| 17100258 | 25 | m | nein | ja   | nein | nein | negativ |
| 17100259 | 50 | m | ja   | ja   | ja   | nein | negativ |
| 17100260 | 47 | m | ja   | ja   | ja   | nein | negativ |
| 17100261 | 47 | m | ja   | ja   | ja   | nein | negativ |
| 17100262 | 26 | m | ja   | ja   | ja   | ja   | negativ |
| 17100263 | 28 | m | ja   | nein | ja   | nein | negativ |
| 17100264 | 24 | m | ja   | ja   | ja   | nein | negativ |
| 17100265 | 30 | m | ja   | ja   | ja   | nein | negativ |
| 17100266 | 29 | m | ja   | nein | ja   | nein | negativ |
| 17100267 | 30 | m | ja   | ja   | ja   | nein | negativ |
| 17100268 | 29 | m | ja   | ja   | ja   | nein | negativ |
| 17100269 | 27 | m | ja   | ja   | ja   | nein | negativ |
| 17100270 | 32 | m | ja   | ja   | ja   | nein | negativ |
| 17100271 | 44 | m | ja   | ja   | ja   | nein | negativ |
| 17100272 | 26 | m | ja   | ja   | ja   | nein | negativ |
| 17100273 | 31 | m | ja   | ja   | ja   | nein | negativ |
| 17100274 | 33 | m | ja   | ja   | ja   | nein | negativ |
| 17100275 | 29 | m | ja   | ja   | ja   | nein | negativ |
| 17100276 | 43 | m | ja   | ja   | ja   | nein | negativ |
| 17100277 | 39 | m | ja   | ja   | ja   | nein | negativ |
| 17100278 | 36 | w | nein | nein | nein | ja   | negativ |
| 17100279 | 27 | m | ja   | ja   | ja   | nein | negativ |
| 17100280 | 28 | m | ja   | ja   | ja   | nein | negativ |
| 17100281 | 52 | m | nein | nein | nein | ja   | negativ |
| 17100282 | 26 | m | ja   | ja   | ja   | nein | negativ |
| 17100283 | 43 | m | ja   | ja   | ja   | nein | negativ |
| 17100284 | 45 | m | ja   | ja   | ja   | nein | negativ |
| 17100285 | 37 | m | ja   | ja   | ja   | nein | negativ |
| 17100286 | 52 | m | ja   | ja   | ja   | nein | negativ |
| 17100287 | 42 | m | ja   | ja   | ja   | nein | negativ |
| 17100288 | 30 | m | ja   | ja   | ja   | nein | negativ |
| 17100289 | 37 | m | ja   | ja   | ja   | nein | negativ |
| 17100290 | 40 | m | ja   | ja   | ja   | nein | negativ |
| 17100291 | 58 | m | nein | nein | nein | ja   | negativ |

|          |    |   |      |      |      |      |         |
|----------|----|---|------|------|------|------|---------|
| 17100292 | 43 | m | nein | nein | nein | ja   | negativ |
| 17100293 | 61 | m | nein | nein | nein | ja   | negativ |
| 17100294 | 51 | m | nein | nein | nein | ja   | negativ |
| 17100295 | 30 | w | nein | nein | nein | ja   | negativ |
| 17100296 | 22 | w | nein | nein | nein | ja   | negativ |
| 17100297 | 44 | m | nein | nein | nein | ja   | negativ |
| 17100298 | 30 | m | ja   | ja   | ja   | nein | negativ |
| 17100299 | 28 | m | ja   | ja   | ja   | nein | negativ |
| 17100300 | 26 | m | nein | nein | nein | ja   | negativ |
| 17100301 | 46 | m | nein | nein | ja   | ja   | negativ |
| 17100302 | 28 | m | nein | nein | nein | ja   | negativ |
| 17100303 | 24 | w | nein | nein | nein | ja   | negativ |
| 17100304 | 27 | m | ja   | nein | ja   | nein | negativ |
| 17100305 | 40 | m | ja   | ja   | ja   | nein | negativ |
| 17100306 | 52 | m | nein | nein | nein | ja   | negativ |
| 17100307 | 21 | w | ja   | nein | nein | nein | negativ |
| 17100308 | 36 | m | ja   | nein | ja   | nein | negativ |
| 17100309 | 22 | m | ja   | nein | nein | nein | negativ |
| 17100310 | 23 | m | ja   | nein | nein | nein | negativ |
| 17100311 | 34 | m | ja   | nein | nein | nein | negativ |
| 17100312 | 21 | m | ja   | nein | nein | nein | negativ |
| 17100313 | 32 | m | ja   | nein | nein | nein | negativ |
| 17100314 | 29 | m | ja   | nein | ja   | nein | negativ |
| 17100315 | 29 | m | ja   | nein | nein | nein | negativ |
| 17100316 | 18 | w | ja   | nein | nein | nein | negativ |
| 17100317 | 21 | w | ja   | nein | nein | nein | negativ |
| 17100318 | 47 | m | ja   | nein | ja   | nein | negativ |
| 17100319 | 49 | w | ja   | nein | nein | nein | negativ |
| 17100320 | 35 | m | ja   | nein | nein | nein | negativ |
| 17100321 | 53 | m | ja   | nein | ja   | nein | negativ |
| 17100322 | 19 | m | ja   | nein | nein | nein | negativ |
| 17100323 | 35 | m | ja   | nein | ja   | nein | negativ |
| 17100324 | 38 | m | ja   | nein | ja   | nein | negativ |
| 17100325 | 21 | m | ja   | nein | nein | nein | negativ |
| 17100326 | 48 | m | ja   | nein | ja   | nein | negativ |
| 17100327 | 48 | m | ja   | nein | ja   | nein | negativ |
| 17100328 | 28 | m | ja   | nein | ja   | nein | negativ |
| 17100329 | 50 | m | ja   | nein | ja   | nein | negativ |
| 17100330 | 26 | w | ja   | nein | nein | nein | negativ |
| 17100331 | 53 | m | ja   | nein | nein | nein | negativ |
| 17100332 | 25 | m | ja   | nein | ja   | nein | negativ |
| 17100333 | 18 | m | ja   | nein | nein | nein | negativ |
| 17100334 | 29 | m | ja   | nein | ja   | nein | negativ |
| 17100335 | 21 | m | ja   | nein | nein | nein | negativ |
| 17100336 | 19 | w | ja   | nein | nein | nein | negativ |
| 17100337 | 20 | w | ja   | nein | nein | nein | negativ |
| 17100338 | 43 | m | ja   | nein | ja   | nein | negativ |
| 17100339 | 24 | m | ja   | nein | nein | nein | negativ |
| 17100340 | 37 | m | ja   | nein | nein | ja   | negativ |
| 17100341 | 25 | m | ja   | nein | nein | nein | negativ |

|          |    |   |      |      |      |      |         |
|----------|----|---|------|------|------|------|---------|
| 17100342 | 52 | m | ja   | nein | nein | nein | negativ |
| 17100343 | 44 | m | ja   | nein | ja   | nein | negativ |
| 17100344 | 50 | m | ja   | nein | nein | nein | negativ |
| 17100345 | 41 | m | ja   | nein | ja   | nein | negativ |
| 17100346 | 35 | m | ja   | nein | ja   | nein | negativ |
| 17100347 | 25 | w | ja   | nein | nein | nein | negativ |
| 17100348 | 21 | w | ja   | nein | nein | nein | negativ |
| 17100349 | 27 | w | nein | nein | nein | ja   | negativ |
| 17100350 | 23 | w | nein | nein | nein | ja   | negativ |
| 17100351 | 27 | m | ja   | nein | ja   | nein | negativ |
| 17100352 | 52 | w | ja   | nein | nein | nein | negativ |
| 17100353 | 45 | m | nein | nein | nein | ja   | negativ |
| 17100354 | 37 | w | nein | nein | nein | ja   | negativ |
| 17100355 | 25 | m | ja   | nein | nein | nein | negativ |
| 17100356 | 29 | m | ja   | nein | nein | nein | negativ |
| 17100357 | 21 | m | ja   | nein | nein | nein | negativ |
| 17100358 | 21 | w | ja   | nein | nein | nein | negativ |
| 17100359 | 23 | m | nein | nein | ja   | nein | negativ |
| 17100360 | 23 | w | ja   | nein | nein | nein | negativ |
| 17100361 | 28 | m | ja   | nein | ja   | nein | negativ |
| 17100362 | 25 | m | ja   | nein | nein | nein | negativ |
| 17100363 | 34 | m | ja   | nein | nein | nein | negativ |
| 17100364 | 34 | m | ja   | nein | ja   | nein | negativ |
| 17100365 | 45 | m | ja   | ja   | ja   | nein | negativ |
| 17100366 | 30 | m | ja   | nein | nein | nein | negativ |
| 17100367 | 53 | m | nein | nein | ja   | nein | negativ |
| 17100368 | 38 | w | ja   | nein | nein | nein | negativ |
| 17100369 | 30 | m | ja   | nein | ja   | nein | negativ |
| 17100371 | 43 | m | ja   | nein | ja   | nein | negativ |
| 17100372 | 21 | m | ja   | nein | nein | nein | negativ |
| 17100373 | 28 | m | ja   | nein | ja   | nein | negativ |
| 17100374 | 23 | m | ja   | nein | nein | nein | negativ |
| 17100375 | 26 | m | ja   | nein | nein | nein | negativ |
| 17100376 | 39 | m | ja   | nein | ja   | nein | negativ |
| 17100377 | 19 | w | ja   | nein | nein | nein | negativ |
| 17100378 | 23 | m | ja   | nein | nein | nein | negativ |
| 17100379 | 53 | m | ja   | nein | nein | nein | negativ |
| 17100380 | 28 | m | ja   | nein | nein | nein | negativ |
| 17100381 | 23 | m | ja   | nein | nein | nein | negativ |
| 17100382 | 21 | m | ja   | nein | nein | nein | negativ |
| 17100383 | 23 | w | ja   | nein | nein | nein | negativ |
| 17100384 | 21 | m | ja   | nein | nein | nein | negativ |
| 17100385 | 29 | m | ja   | nein | ja   | nein | negativ |
| 17100386 | 27 | m | ja   | nein | nein | nein | negativ |
| 17100388 | 38 | m | ja   | nein | nein | nein | negativ |
| 17100389 | 42 | m | ja   | nein | ja   | nein | negativ |
| 17100390 | 46 | m | ja   | nein | ja   | nein | negativ |
| 17100391 | 21 | m | ja   | nein | nein | nein | negativ |
| 17100392 | 24 | m | ja   | nein | nein | nein | negativ |
| 17100393 | 58 | m | ja   | nein | ja   | nein | negativ |



|          |    |   |      |      |      |      |         |
|----------|----|---|------|------|------|------|---------|
| 17100394 | 28 | m | ja   | nein | ja   | nein | negativ |
| 17100396 | 38 | m | ja   | nein | ja   | nein | negativ |
| 17100397 | 29 | m | ja   | ja   | ja   | nein | negativ |
| 17100398 | 45 | m | ja   | nein | ja   | nein | negativ |
| 17100399 | 25 | m | ja   | nein | nein | nein | negativ |
| 17100400 | 33 | m | ja   | nein | ja   | nein | negativ |
| 17100401 | 35 | m | ja   | nein | nein | nein | negativ |
| 17100402 | 56 | m | ja   | nein | ja   | nein | negativ |
| 17100403 | 39 | m | ja   | nein | ja   | nein | negativ |
| 17100404 | 48 | m | ja   | nein | ja   | nein | negativ |
| 17100405 | 36 | m | ja   | nein | ja   | nein | negativ |
| 17100406 | 19 | m | ja   | nein | nein | nein | negativ |
| 17100407 | 22 | w | nein | nein | nein | ja   | negativ |
| 17100408 | 24 | m | ja   | nein | nein | nein | negativ |
| 17100409 | 29 | m | ja   | nein | ja   | nein | negativ |
| 17100410 | 23 | m | ja   | nein | nein | nein | negativ |
| 17100411 | 44 | m | ja   | nein | ja   | nein | negativ |
| 17100412 | 18 | m | ja   | nein | nein | nein | negativ |
| 17100413 | 35 | m | ja   | nein | nein | nein | negativ |
| 17100414 | 26 | m | ja   | nein | nein | nein | negativ |
| 17100415 | 21 | m | ja   | nein | nein | nein | negativ |
| 17100416 | 37 | m | ja   | nein | nein | nein | negativ |
| 17100417 | 22 | w | ja   | nein | nein | nein | negativ |
| 17100418 | 26 | m | nein | nein | nein | ja   | negativ |
| 17100419 | 31 | m | ja   | nein | nein | nein | negativ |
| 17100421 | 49 | m | ja   | nein | ja   | nein | negativ |
| 17100422 | 32 | m | ja   | nein | ja   | nein | negativ |
| 17100423 | 46 | m | ja   | ja   | ja   | nein | negativ |
| 17100424 | 33 | m | ja   | nein | ja   | nein | negativ |
| 17100425 | 31 | m | ja   | nein | ja   | nein | negativ |
| 17100426 | 27 | m | ja   | nein | nein | nein | negativ |
| 17100427 | 26 | m | ja   | nein | nein | nein | negativ |
| 17100428 | 26 | m | ja   | nein | nein | nein | negativ |
| 17100429 | 54 | m | ja   | nein | nein | nein | negativ |
| 17100430 | 40 | m | ja   | nein | ja   | nein | negativ |
| 17100431 | 35 | m | ja   | ja   | ja   | nein | negativ |
| 17100432 | 43 | m | ja   | nein | ja   | nein | negativ |
| 17100433 | 21 | m | ja   | nein | nein | nein | negativ |
| 17100434 | 21 | w | ja   | nein | nein | nein | negativ |
| 17100435 | 43 | m | ja   | nein | nein | nein | negativ |
| 17100436 | 54 | m | ja   | nein | ja   | nein | negativ |
| 17100437 | 45 | m | ja   | nein | nein | ja   | negativ |
| 17100438 | 26 | m | ja   | nein | nein | nein | negativ |
| 17100439 | 28 | m | ja   | nein | ja   | nein | negativ |
| 17100440 | 25 | m | ja   | ja   | ja   | nein | negativ |
| 17100441 | 28 | m | ja   | nein | ja   | nein | negativ |
| 17100442 | 33 | m | ja   | nein | ja   | nein | negativ |
| 17100443 | 38 | m | nein | nein | nein | ja   | negativ |
| 17100444 | 22 | w | nein | nein | nein | ja   | negativ |
| 17100445 | 57 | m | nein | nein | nein | ja   | negativ |

|          |    |   |      |      |      |      |         |
|----------|----|---|------|------|------|------|---------|
| 17100446 | 50 | w | nein | nein | nein | ja   | negativ |
| 17100447 | 25 | m | nein | nein | nein | ja   | negativ |
| 17100448 | 50 | w | nein | nein | nein | ja   | negativ |
| 17100449 | 54 | w | nein | nein | nein | ja   | negativ |
| 17100450 | 24 | w | nein | nein | nein | ja   | negativ |
| 17100451 | 49 | m | nein | nein | nein | ja   | negativ |
| 17100452 | 36 | m | nein | nein | ja   | ja   | negativ |
| 17100453 | 53 | m | nein | nein | nein | ja   | negativ |
| 17100454 | 50 | m | nein | nein | nein | ja   | negativ |
| 17100455 | 60 | w | nein | nein | nein | ja   | negativ |
| 17100456 | 57 | m | nein | nein | nein | ja   | negativ |
| 17100457 | 52 | w | nein | nein | nein | ja   | negativ |
| 17100459 | 53 | m | nein | nein | nein | ja   | negativ |
| 17100460 | 37 | w | nein | nein | nein | ja   | negativ |
| 17100461 | 45 | m | nein | nein | nein | ja   | negativ |
| 17100462 | 25 | w | nein | nein | nein | ja   | negativ |
| 17100463 | 49 | m | nein | nein | nein | ja   | negativ |
| 17100464 | 38 | w | nein | nein | nein | ja   | negativ |
| 17100465 | 22 | w | nein | nein | nein | ja   | negativ |
| 17100466 | 23 | w | nein | nein | nein | ja   | negativ |
| 17100467 | 46 | m | nein | nein | nein | ja   | negativ |
| 17100468 | 52 | m | nein | nein | nein | ja   | negativ |
| 17100469 | 54 | m | nein | nein | nein | ja   | negativ |
| 17100470 | 41 | m | nein | nein | nein | ja   | negativ |
| 17100471 | 47 | w | nein | nein | nein | ja   | negativ |
| 17100472 | 30 | w | nein | nein | nein | ja   | negativ |
| 17100473 | 57 | m | nein | nein | nein | ja   | negativ |
| 17100474 | 26 | w | nein | nein | nein | ja   | negativ |
| 17100475 | 24 | m | ja   | nein | nein | ja   | negativ |
| 17100476 | 30 | m | nein | nein | ja   | ja   | negativ |
| 17100477 | 42 | w | nein | nein | nein | ja   | negativ |
| 17100478 | 54 | m | nein | nein | nein | ja   | negativ |
| 17100479 | 43 | m | nein | nein | nein | ja   | negativ |
| 17100480 | 60 | w | nein | nein | nein | ja   | negativ |
| 17100481 | 30 | m | nein | nein | nein | ja   | negativ |
| 17100482 | 59 | m | nein | nein | nein | ja   | negativ |
| 17100483 | 44 | m | nein | nein | nein | ja   | negativ |
| 17100484 | 22 | w | nein | nein | nein | ja   | negativ |
| 17100485 | 57 | m | nein | nein | nein | ja   | negativ |
| 17100486 | 63 | m | nein | nein | nein | ja   | negativ |
| 17100487 | 53 | w | nein | nein | nein | ja   | negativ |
| 17100488 | 50 | m | nein | nein | nein | ja   | negativ |
| 17100489 | 53 | m | nein | nein | nein | ja   | negativ |
| 17100490 | 23 | w | ja   | nein | nein | nein | negativ |
| 17100491 | 58 | m | ja   | nein | ja   | nein | negativ |
| 17100492 | 22 | w | ja   | nein | nein | nein | negativ |
| 17100493 | 19 | m | ja   | nein | nein | nein | negativ |
| 17100494 | 20 | m | ja   | nein | nein | nein | negativ |
| 17100495 | 38 | m | ja   | nein | ja   | nein | negativ |
| 17100496 | 28 | m | ja   | nein | nein | nein | negativ |

|          |    |   |      |      |      |      |         |
|----------|----|---|------|------|------|------|---------|
| 17100497 | 54 | m | ja   | nein | nein | nein | negativ |
| 17100498 | 55 | m | ja   | nein | nein | nein | negativ |
| 17100499 | 37 | m | ja   | nein | ja   | ja   | negativ |
| 17100500 | 24 | m | ja   | nein | nein | nein | negativ |
| 17100501 | 25 | m | ja   | nein | nein | nein | negativ |
| 17100502 | 27 | w | ja   | nein | nein | nein | negativ |
| 17100503 | 53 | m | ja   | nein | ja   | nein | negativ |
| 17100504 | 19 | m | ja   | nein | nein | nein | negativ |
| 17100505 | 19 | w | ja   | nein | nein | nein | negativ |
| 17100506 | 32 | m | ja   | nein | ja   | nein | negativ |
| 17100507 | 41 | m | ja   | nein | nein | nein | negativ |
| 17100508 | 46 | m | ja   | nein | nein | nein | negativ |
| 17100509 | 20 | m | ja   | nein | nein | nein | negativ |
| 17100510 | 34 | m | ja   | nein | ja   | nein | negativ |
| 17100511 | 19 | m | ja   | nein | nein | nein | negativ |
| 17100512 | 22 | m | ja   | nein | nein | nein | negativ |
| 17100513 | 37 | w | ja   | nein | nein | nein | negativ |
| 17100514 | 49 | m | ja   | ja   | ja   | nein | negativ |
| 17100515 | 20 | m | ja   | nein | nein | nein | negativ |
| 17100516 | 25 | m | ja   | nein | nein | nein | negativ |
| 17100517 | 47 | m | ja   | nein | ja   | nein | negativ |
| 17100518 | 31 | m | ja   | nein | ja   | nein | negativ |
| 17100519 | 45 | w | ja   | nein | nein | nein | negativ |
| 17100520 | 20 | w | ja   | nein | nein | nein | negativ |
| 17100521 | 51 | m | ja   | nein | ja   | nein | negativ |
| 17100522 | 32 | m | ja   | nein | nein | nein | negativ |
| 17100523 | 19 | w | ja   | nein | nein | nein | negativ |
| 17100524 | 32 | m | ja   | nein | ja   | nein | negativ |
| 17100525 | 36 | w | ja   | nein | nein | nein | negativ |
| 17100526 | 35 | m | ja   | nein | nein | nein | negativ |
| 17100527 | 57 | m | ja   | nein | nein | nein | negativ |
| 17100528 | 45 | m | ja   | nein | ja   | nein | negativ |
| 17100529 | 36 | m | ja   | ja   | ja   | nein | negativ |
| 17100530 | 41 | m | ja   | nein | nein | nein | negativ |
| 17100531 | 38 | m | ja   | nein | ja   | nein | negativ |
| 17100532 | 30 | m | ja   | nein | ja   | nein | negativ |
| 17100533 | 29 | m | ja   | nein | nein | nein | negativ |
| 17100534 | 29 | m | ja   | nein | ja   | nein | negativ |
| 17100535 | 18 | m | ja   | nein | nein | nein | negativ |
| 17100536 | 22 | w | ja   | nein | nein | nein | negativ |
| 17100537 | 25 | m | ja   | nein | ja   | nein | negativ |
| 17100538 | 24 | m | ja   | nein | nein | nein | negativ |
| 17100539 | 25 | m | ja   | nein | nein | nein | negativ |
| 17100540 | 33 | m | ja   | ja   | ja   | nein | negativ |
| 17100541 | 49 | m | ja   | nein | ja   | nein | negativ |
| 17100542 | 43 | m | ja   | nein | ja   | nein | negativ |
| 17100543 | 33 | w | nein | nein | nein | ja   | negativ |
| 17100544 | 26 | w | nein | nein | nein | ja   | negativ |
| 17100545 | 37 | w | nein | nein | nein | ja   | negativ |
| 17100546 | 53 | m | nein | nein | nein | ja   | negativ |

|          |    |   |      |      |      |      |         |
|----------|----|---|------|------|------|------|---------|
| 17100547 | 25 | w | nein | nein | nein | ja   | negativ |
| 17100548 | 39 | m | nein | nein | nein | ja   | negativ |
| 17100549 | 35 | w | nein | nein | nein | ja   | negativ |
| 17100550 | 46 | m | nein | nein | nein | ja   | negativ |
| 17100551 | 75 | m | nein | nein | nein | ja   | negativ |
| 17100552 | 38 | w | nein | nein | nein | ja   | negativ |
| 17100553 | 42 | w | nein | nein | nein | ja   | negativ |
| 17100554 | 37 | w | nein | nein | nein | ja   | negativ |
| 17100555 | 55 | w | nein | nein | nein | ja   | negativ |
| 17100556 | 44 | m | ja   | nein | nein | nein | negativ |
| 17100557 | 41 | m | nein | nein | nein | ja   | negativ |
| 17100558 | 54 | m | nein | nein | nein | ja   | negativ |
| 17100559 | 45 | m | nein | nein | nein | ja   | negativ |
| 17100560 | 22 | m | nein | nein | nein | ja   | negativ |
| 17100562 | 53 | w | nein | nein | nein | ja   | negativ |
| 17100563 | 48 | m | nein | nein | nein | ja   | negativ |
| 17100564 | 42 | w | nein | nein | nein | ja   | negativ |
| 17100565 | 64 | m | nein | nein | nein | ja   | negativ |
| 17100567 | 57 | m | nein | nein | nein | ja   | negativ |
| 17100568 | 55 | w | nein | nein | nein | ja   | negativ |
| 17100569 | 34 | m | ja   | nein | nein | ja   | negativ |
| 17100570 | 28 | m | nein | nein | nein | ja   | negativ |
| 17100571 | 47 | w | nein | nein | nein | ja   | negativ |
| 17100572 | 28 | w | Nein | Nein | Nein | Ja   | negativ |
| 17100573 | 59 | w | nein | nein | nein | ja   | negativ |
| 17100574 | 62 | w | nein | nein | nein | nein | negativ |
| 17100575 | 23 | w | nein | nein | nein | ja   | negativ |
| 17100576 | 30 | w | nein | nein | nein | ja   | negativ |
| 17100577 | 54 | w | nein | nein | nein | ja   | negativ |
| 17100578 | 40 | m | nein | nein | nein | ja   | negativ |
| 17100579 | 24 | w | nein | nein | nein | ja   | negativ |
| 17100580 | 21 | m | nein | nein | nein | ja   | negativ |
| 17100581 | 37 | w | nein | nein | nein | nein | negativ |
| 17100582 | 59 | w | nein | nein | nein | nein | negativ |
| 17100583 | 50 | m | ja   | nein | ja   | nein | negativ |
| 17100584 | 23 | w | ja   | nein | nein | nein | negativ |
| 17100585 | 26 | m | ja   | nein | ja   | nein | negativ |
| 17100586 | 58 | m | ja   | nein | ja   | nein | negativ |
| 17100587 | 26 | m | ja   | nein | nein | nein | negativ |
| 17100588 | 31 | m | ja   | nein | ja   | ja   | negativ |
| 17100589 | 50 | w | nein | nein | nein | ja   | negativ |
| 17100590 | 40 | m | ja   | ja   | ja   | nein | negativ |
| 17100591 | 26 | m | ja   | nein | ja   | nein | negativ |
| 17100592 | 47 | m | ja   | nein | ja   | nein | negativ |
| 17100593 | 54 | m | nein | nein | nein | ja   | negativ |
| 17100594 | 39 | m | ja   | nein | ja   | nein | negativ |
| 17100595 | 27 | m | ja   | nein | ja   | nein | negativ |
| 17100596 | 30 | w | nein | nein | nein | ja   | negativ |
| 17100597 | 28 | m | ja   | nein | ja   | nein | negativ |
| 17100598 | 24 | m | ja   | nein | nein | nein | negativ |

|          |    |   |      |      |      |      |         |
|----------|----|---|------|------|------|------|---------|
| 17100599 | 43 | m | ja   | nein | ja   | nein | negativ |
| 17100600 | 53 | m | ja   | nein | ja   | nein | negativ |
| 17100601 | 26 | m | nein | nein | ja   | nein | negativ |
| 17100602 | 33 | m | ja   | nein | nein | nein | negativ |
| 17100603 | 45 | m | ja   | nein | ja   | nein | negativ |
| 17100604 | 33 | m | ja   | nein | ja   | nein | negativ |
| 17100605 | 25 | m | ja   | ja   | ja   | nein | negativ |
| 17100606 | 44 | m | ja   | nein | nein | nein | negativ |
| 17100607 | 32 | w | ja   | ja   | nein | nein | negativ |
| 17100608 | 52 | m | ja   | nein | nein | nein | negativ |
| 17100609 | 44 | m | ja   | nein | nein | nein | negativ |
| 17100610 | 42 | m | ja   | nein | ja   | nein | negativ |
| 17100611 | 47 | m | ja   | nein | nein | nein | negativ |
| 17100612 | 46 | m | ja   | ja   | ja   | nein | negativ |
| 17100613 | 45 | m | ja   | ja   | ja   | ja   | negativ |
| 17100614 | 56 | m | nein | nein | nein | ja   | negativ |
| 17100615 | 31 | m | ja   | ja   | ja   | nein | negativ |
| 17100616 | 35 | m | nein | nein | ja   | ja   | negativ |
| 17100617 | 51 | m | nein | nein | nein | ja   | negativ |
| 17100618 | 31 | m | ja   | nein | ja   | nein | negativ |
| 17100619 | 57 | m | nein | nein | ja   | ja   | negativ |
| 17100620 | 54 | m | ja   | nein | ja   | nein | negativ |
| 17100621 | 31 | m | ja   | nein | ja   | nein | negativ |
| 17100622 | 25 | m | ja   | nein | nein | nein | negativ |
| 17100623 | 52 | w | nein | nein | nein | ja   | negativ |
| 17100624 | 42 | m | ja   | nein | ja   | nein | negativ |
| 17100625 | 48 | m | ja   | nein | ja   | nein | negativ |
| 17100626 | 50 | m | ja   | nein | ja   | nein | negativ |
| 17100627 | 57 | m | nein | nein | nein | ja   | negativ |
| 17100628 | 38 | m | ja   | nein | ja   | nein | negativ |
| 17100629 | 56 | m | nein | nein | nein | ja   | negativ |
| 17100630 | 27 | m | ja   | ja   | ja   | ja   | negativ |
| 17100631 | 28 | m | ja   | nein | nein | nein | negativ |
| 17100632 | 28 | m | ja   | nein | ja   | nein | negativ |
| 17100633 | 25 | m | nein | nein | ja   | nein | negativ |
| 17100635 | 41 | m | ja   | nein | ja   | nein | negativ |
| 17100636 | 27 | m | ja   | nein | ja   | nein | negativ |
| 17100637 | 20 | m | ja   | nein | nein | nein | negativ |
| 17100638 | 25 | m | ja   | nein | ja   | nein | negativ |
| 17100639 | 27 | m | ja   | nein | ja   | nein | negativ |
| 17100640 | 25 | m | ja   | ja   | ja   | nein | negativ |
| 17100641 | 32 | m | ja   | nein | ja   | nein | negativ |
| 17100642 | 30 | m | ja   | nein | ja   | nein | negativ |
| 17100643 | 23 | m | nein | nein | nein | ja   | negativ |
| 17100644 | 42 | m | ja   | nein | ja   | nein | negativ |
| 17100645 | 43 | m | ja   | ja   | ja   | nein | negativ |
| 17100646 | 46 | m | ja   | ja   | ja   | nein | negativ |
| 17100647 | 33 | m | ja   | nein | ja   | ja   | negativ |
| 17100648 | 29 | m | ja   | ja   | ja   | ja   | negativ |
| 17100649 | 55 | m | nein | nein | ja   | nein | negativ |

|          |    |   |      |      |      |      |         |
|----------|----|---|------|------|------|------|---------|
| 17100650 | 43 | w | ja   | nein | nein | nein | negativ |
| 17100651 | 53 | m | nein | nein | nein | ja   | negativ |
| 17100652 | 34 | m | ja   | nein | ja   | nein | negativ |
| 17100653 | 49 | m | ja   | nein | nein | nein | negativ |
| 17100654 | 45 | m | ja   | nein | ja   | nein | negativ |
| 17100655 | 21 | m | ja   | nein | nein | nein | negativ |
| 17100656 | 23 | m | ja   | nein | nein | nein | negativ |
| 17100657 | 24 | m | ja   | nein | nein | nein | negativ |
| 17100658 | 30 | w | nein | nein | nein | ja   | negativ |
| 17100659 | 29 | m | ja   | ja   | ja   | nein | negativ |
| 17100660 | 27 | m | ja   | ja   | ja   | nein | negativ |
| 17100661 | 41 | m | ja   | nein | ja   | nein | negativ |
| 17100662 | 35 | m | ja   | ja   | ja   | nein | negativ |
| 17100663 | 41 | m | ja   | ja   | ja   | ja   | negativ |
| 17100664 | 25 | m | ja   | ja   | ja   | nein | negativ |
| 17100665 | 25 | m | ja   | ja   | ja   | nein | negativ |
| 17100666 | 21 | m | ja   | nein | ja   | nein | negativ |
| 17100667 | 33 | m | ja   | ja   | ja   | nein | negativ |
| 17100668 | 31 | m | ja   | nein | ja   | nein | negativ |
| 17100669 | 34 | m | ja   | ja   | ja   | nein | negativ |
| 17100670 | 26 | m | nein | nein | nein | ja   | negativ |
| 17100671 | 31 | m | ja   | ja   | ja   | nein | negativ |
| 17100672 | 33 | m | ja   | nein | nein | nein | negativ |
| 17100673 | 45 | m | ja   | ja   | ja   | nein | negativ |
| 17100674 | 52 | m | nein | nein | ja   | nein | negativ |
| 17100675 | 23 | m | nein | nein | nein | ja   | negativ |
| 17100676 | 32 | m | ja   | ja   | ja   | nein | negativ |
| 17100677 | 35 | m | nein | nein | ja   | ja   | negativ |
| 17100678 | 31 | m | ja   | ja   | ja   | nein | negativ |
| 17100679 | 39 | m | ja   | nein | ja   | nein | negativ |
| 17100680 | 26 | m | ja   | ja   | ja   | nein | negativ |
| 17100681 | 25 | m | ja   | nein | ja   | nein | negativ |
| 17100682 | 50 | m | nein | nein | ja   | nein | negativ |
| 17100683 | 51 | m | ja   | nein | ja   | nein | negativ |
| 17100684 | 57 | m | nein | nein | ja   | nein | negativ |
| 17100685 | 37 | m | nein | nein | ja   | nein | negativ |
| 17100686 | 46 | m | nein | nein | ja   | nein | negativ |
| 17100687 | 36 | m | ja   | ja   | ja   | nein | negativ |
| 17100688 | 54 | m | nein | nein | ja   | nein | negativ |
| 17100689 | 55 | m | ja   | nein | ja   | ja   | negativ |
| 17100690 | 50 | m | ja   | nein | ja   | ja   | negativ |
| 17100691 | 43 | m | nein | nein | ja   | ja   | negativ |
| 17100692 | 43 | m | nein | nein | ja   | nein | negativ |
| 17100693 | 32 | w | nein | nein | ja   | ja   | negativ |
| 17100694 | 52 | m | nein | nein | ja   | ja   | negativ |
| 17100695 | 45 | m | ja   | nein | nein | nein | negativ |
| 17100696 | 57 | m | nein | nein | ja   | nein | negativ |
| 17100697 | 33 | m | nein | nein | ja   | nein | negativ |
| 17100698 | 31 | m | nein | nein | nein | ja   | negativ |
| 17100699 | 56 | w | nein | nein | nein | ja   | negativ |

|          |    |   |      |      |      |      |         |
|----------|----|---|------|------|------|------|---------|
| 17100700 | 43 | w | nein | nein | nein | ja   | negativ |
| 17100701 | 22 | m | ja   | nein | ja   | ja   | negativ |
| 17100702 | 46 | m | nein | nein | nein | ja   | negativ |
| 17100703 | 55 | m | nein | nein | nein | ja   | negativ |
| 17100704 | 57 | m | nein | nein | nein | ja   | negativ |
| 17100705 | 27 | m | ja   | ja   | ja   | nein | negativ |
| 17100706 | 43 | m | nein | nein | ja   | ja   | negativ |
| 17100707 | 40 | m | ja   | nein | ja   | nein | negativ |
| 17100708 | 44 | m | nein | nein | ja   | nein | negativ |
| 17100709 | 43 | m | ja   | nein | ja   | nein | negativ |
| 17100710 | 30 | m | nein | nein | ja   | ja   | negativ |
| 17100711 | 38 | m | nein | nein | ja   | nein | negativ |
| 17100712 | 53 | m | nein | nein | ja   | nein | negativ |
| 17100713 | 38 | m | nein | nein | ja   | ja   | negativ |
| 17100714 | 49 | m | nein | nein | ja   | nein | negativ |
| 17100715 | 56 | m | nein | nein | ja   | nein | negativ |
| 17100716 | 23 | m | nein | nein | ja   | ja   | negativ |
| 17100717 | 54 | m | nein | nein | ja   | nein | negativ |
| 17100718 | 42 | m | nein | nein | ja   | nein | negativ |
| 17100719 | 40 | m | nein | nein | ja   | nein | negativ |
| 17100720 | 39 | m | nein | nein | ja   | nein | negativ |
| 17100721 | 50 | m | ja   | nein | ja   | nein | negativ |
| 17100722 | 44 | m | nein | nein | ja   | ja   | negativ |
| 17100723 | 50 | m | nein | nein | ja   | nein | negativ |
| 17100724 | 41 | m | ja   | ja   | ja   | nein | negativ |
| 17100725 | 53 | m | ja   | nein | ja   | nein | negativ |
| 17100726 | 51 | m | ja   | nein | ja   | nein | negativ |
| 17100727 | 23 | m | ja   | nein | ja   | nein | negativ |
| 17100728 | 25 | m | ja   | ja   | ja   | nein | negativ |
| 17100729 | 32 | w | nein | nein | nein | ja   | negativ |
| 17100730 | 39 | m | ja   | nein | ja   | nein | negativ |
| 17100731 | 25 | m | ja   | ja   | ja   | nein | negativ |
| 17100732 | 56 | m | ja   | ja   | ja   | nein | negativ |
| 17100734 | 32 | m | ja   | nein | nein | nein | negativ |
| 17100735 | 23 | m | ja   | ja   | ja   | nein | negativ |
| 17100736 | 28 | m | ja   | ja   | ja   | nein | negativ |
| 17100737 | 53 | m | nein | nein | nein | ja   | negativ |
| 17100738 | 25 | m | ja   | nein | ja   | nein | negativ |
| 17100739 | 26 | m | nein | nein | nein | ja   | negativ |
| 17100740 | 27 | m | ja   | nein | ja   | nein | negativ |
| 17100741 | 21 | m | ja   | nein | nein | nein | negativ |
| 17100742 | 28 | w | ja   | nein | nein | nein | negativ |
| 17100743 | 29 | w | ja   | nein | nein | nein | negativ |
